# Supplementary material for: A′–A–π–D–π–A–A′ extended small-molecule photovoltaic donor based on fluorene-diketopyrrolopyrrole with an end-group fluorination effect
Source: Royal Society of Chemistry journal article supplement (doi:10.1039/d2ma00510g), 2022-01-01
Supplement: d2ma00510g1.pdf [file d2ma00510g1.pdf]

## Supporting Information

### **A'-A- $\pi$ -D- $\pi$ -A-A' extended small-molecule photovoltaic donor based on fluorene-diketopyrrolopyrrole with end-group fluorination effect**

Yang Liu<sup>a</sup>, Lunxiang Yin<sup>\*a</sup>, Bao Xie<sup>a</sup>, Chang Liu<sup>a</sup> and Yanqin Li<sup>\*a</sup>

<sup>a</sup> School of Chemical Engineering, Dalian University of Technology, Linggong Road 2, Dalian, P. R. China.

\*Corresponding author. E-mail: lxyin@dlut.edu.cn; liyanqin@dlut.edu.cn

### **Contents**

|                                                                                 |    |
|---------------------------------------------------------------------------------|----|
| 1. Synthesis .....                                                              | 2  |
| 2. Spectra of <sup>1</sup> H-NMR, <sup>13</sup> C-NMR , and MALDI-TOF HRMS..... | 8  |
| 3. TD-DFT calculated electronic transitions .....                               | 12 |
| 4. CV curve of Fc/Fc+ .....                                                     | 13 |
| 5. Contact angle measurements .....                                             | 13 |
| 6. References .....                                                             | 14 |

## 1. Synthesis

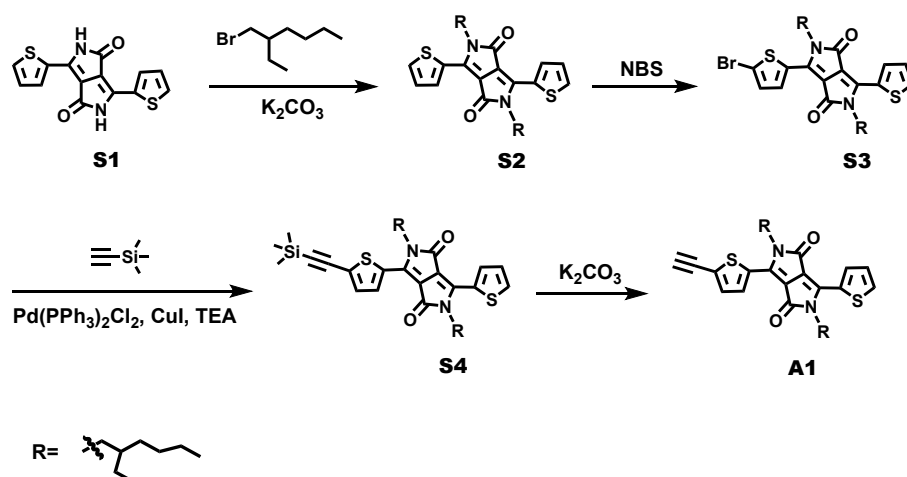

**Scheme S1.** Synthetic routes of the diketopyrrolopyrrole (DPP)-based compound **A1**.

### Synthesis of 3,6-di(thiophen-2-yl)-2,5-dihydropyrrolo[3,4-c]pyrrole-1,4-dione (**S1**)

Compound **S1** was synthesized according to the previously reported methods.<sup>1</sup>

### Synthesis of 2,5-bis(2-ethylhexyl)-3,6-di(thiophen-2-yl)-2,5-dihydropyrrolo[3,4-c]pyrrole-1,4-dione (**S2**)<sup>2</sup>

A mixture of compound **S1** (1.80 g, 6 mmol), K<sub>2</sub>CO<sub>3</sub> (3.31 g, 24 mmol), 18-crown-6 (0.79 g, 3 mmol), and 35 mL of N, N-dimethylformamide (DMF) was stirred at 120 °C for 1 h under nitrogen. Then 1-Bromo-2-ethylhexane (1.73 g, 9 mmol) in DMF (15 mL) was dropped slowly into the reaction solution and heated at 130 °C for 18 h under nitrogen. After cooling to room temperature, the mixture was poured into water (50 mL). The resulting mixture was extracted with CH<sub>2</sub>Cl<sub>2</sub> (3 × 20 mL) and the combined organic phase was dried over anhydrous Na<sub>2</sub>SO<sub>4</sub>. After removing the solvent, the residue was purified by column chromatography on silica gel eluting with petroleum ether/CH<sub>2</sub>Cl<sub>2</sub> (2:3, v/v) to give a red solid (724 mg, 23%). M.p.: 102-104 °C. <sup>1</sup>H-NMR (500 MHz, CDCl<sub>3</sub>, ppm) δ 8.89 (dd, *J*<sub>1</sub> = 3.8 Hz, *J*<sub>2</sub> = 0.9 Hz, 2H), 7.62 (dd, *J*<sub>1</sub> = 5.0 Hz, *J*<sub>2</sub> = 0.9 Hz, 2H), 7.27 (d, *J* = 4.7 Hz, 2H), 4.08-3.97 (m, 4H), 1.91-1.81 (m, 2H), 1.40-1.21 (m, 16H), 0.90-0.83 (m, 12H).

### Synthesis of 3-(5-bromothiophen-2-yl)-2,5-bis(2-ethylhexyl)-6-(thiophen-2-yl)-2,5-dihydropyrrolo[3,4-c]pyrrole-1,4-dione (**S3**)<sup>3</sup>

A mixture of compound **S2** (840 mg, 1.60 mmol) and CHCl<sub>3</sub> (40 mL) was stirred at 0 °C for 20 min. A solution of NBS (120 mg, 1.70 mmol) in CHCl<sub>3</sub> (10 mL) was added dropwise to the reaction solution at 0 °C and the resulting mixture was stirred at room temperature overnight in dark. The reaction solution was poured into water (30 mL) and the resulting solution was extracted with

CH<sub>2</sub>Cl<sub>2</sub> (3 × 30 mL). The combined organic phase was dried over anhydrous Na<sub>2</sub>SO<sub>4</sub>. After removing the solvent, the residue was purified by column chromatography on silica gel with petroleum ether/CH<sub>2</sub>Cl<sub>2</sub> (2:3, v/v) as an eluent to afford a red solid. (608 mg, 63%). M.p.:125-127 °C. <sup>1</sup>H-NMR (400 MHz, CDCl<sub>3</sub>, ppm) δ 8.93-8.87 (m, 1H), 8.63 (d, *J* = 4.2 Hz, 1H), 7.69-7.58 (m, 1H), 7.28 (d, *J* = 4.3 Hz, 1H), 7.22 (d, *J* = 4.2 Hz, 1H), 4.04-3.87 (m, 4H), 1.91-1.81 (m, 2H), 1.38-1.21 (m, 16H), 0.92-0.83 (m, 12H).

Compound **S4** and **A1** were synthesized by reported procedure.<sup>4</sup> The synthesis details are provided as follows.

**Synthesis of 2,5-bis(2-ethylhexyl)-3-(thiophen-2-yl)-6-(5-((trimethylsilyl)ethynyl)thiophen-2-yl)-2,5-dihydropyrrolo[3,4-c]pyrrole-1,4-dione (S4)**

A mixture of compound **S3** (570 mg, 0.83 mmol), Pd(PPh<sub>3</sub>)Cl<sub>2</sub> (25 mg, 0.04 mmol), CuI (12 mg, 0.07 mmol), THF (30 mL), TEA (22 mL), and trimethylsilylacetylene (0.4 mL, 2.49 mmol) was heated at 70 °C for 24 h under nitrogen. After cooling to room temperature, the reaction solution was poured into water (30 mL). The resulting solution was extracted with CH<sub>2</sub>Cl<sub>2</sub> (3 × 20 mL). The combined organic phase was dried with anhydrous Na<sub>2</sub>SO<sub>4</sub>. After removing the solvent, the residue was purified by silica gel column chromatography with petroleum ether/CH<sub>2</sub>Cl<sub>2</sub> (1:2, v/v) to give a red solid (428 mg, 83%). M.p.:129-131 °C. <sup>1</sup>H-NMR (500 MHz, CDCl<sub>3</sub>, ppm) δ 8.91 (dd, *J*<sub>1</sub> = 3.9 Hz, *J*<sub>2</sub> = 1.0 Hz, 1H), 8.79 (d, *J* = 4.1 Hz, 1H), 7.64 (dd, *J*<sub>1</sub> = 5.0 Hz, *J*<sub>2</sub> = 1.1 Hz, 1H), 7.32 (d, *J* = 4.1 Hz, 1H), 7.28-7.27 (m, 1H), 4.07-3.93 (m, 4H), 1.93-1.82 (m, 2H), 1.41-1.22 (m, 16H), 0.92-0.84 (m, 12H), 0.28 (s, 9H).

**Synthesis of 3-(5-ethynylthiophen-2-yl)-2,5-bis(2-ethylhexyl)-6-(thiophen-2-yl)-2,5-dihydropyrrolo[3,4-c]pyrrole-1,4-dione (A1)**

A mixture of compound **S4** (428 mg, 0.69 mmol), K<sub>2</sub>CO<sub>3</sub> (381 mg, 2.76 mmol), THF (20 mL), and methanol (20 mL) was stirred at room temperature for 2 h. The reaction solution was poured into water (30 mL) and the resulting solution was extracted with CH<sub>2</sub>Cl<sub>2</sub> (3 × 20 mL). The combined organic phase was dried with anhydrous Na<sub>2</sub>SO<sub>4</sub>. After removing the solvent, the residue was purified by silica gel column chromatography with petroleum ether/CH<sub>2</sub>Cl<sub>2</sub> (1:2, v/v) to afford a red solid. (356 mg, 94%). M.p.:130-132 °C. <sup>1</sup>H-NMR (500 MHz, CDCl<sub>3</sub>, ppm) δ 8.93 (d, *J* = 3.9 Hz, 1H), 8.79 (d, *J* = 4.1 Hz, 1H), 7.65 (d, *J* = 4.9 Hz, 1H), 7.38 (d, *J* = 4.1 Hz, 1H), 7.29-7.26 (m, 1H), 4.06-3.94 (m, 4H), 3.58 (s, 1H), 1.91-1.83 (m, 2H), 1.38-1.22 (m, 16H), 0.93-0.85 (m, 12H).

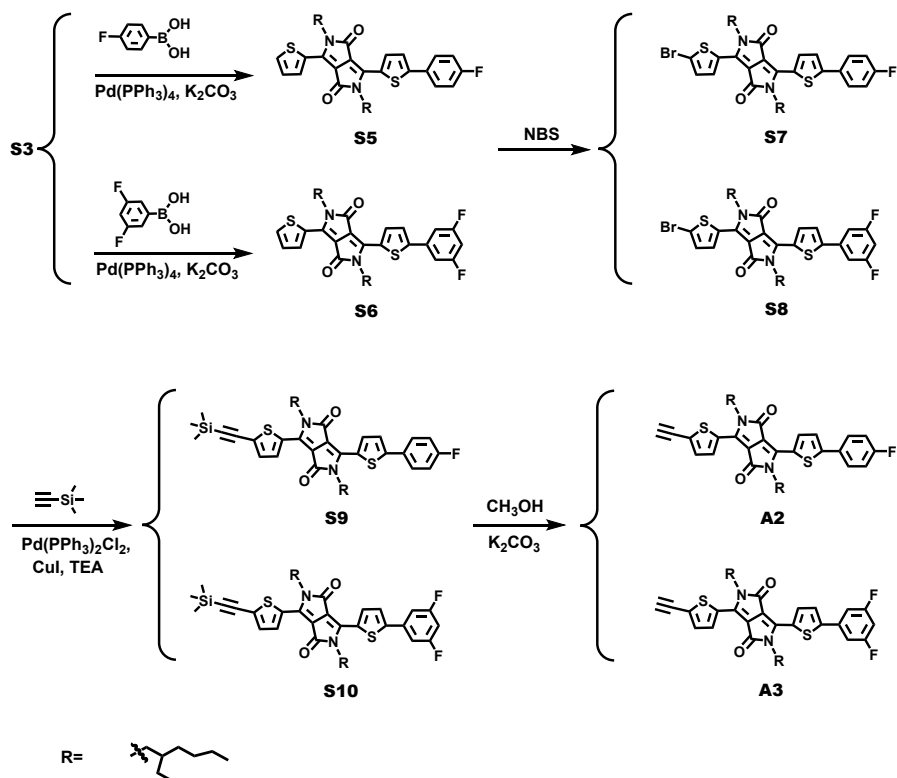

**Scheme S2.** Synthetic routes of the diketopyrrolopyrrole (DPP)-based compounds **A2** and **A3**.

### Synthesis of 3-(5-(4-fluorophenyl)thiophen-2-yl)-2,5-bis(2-ethylhexyl)-6-(thiophen-2-yl)-2,5-dihydropyrrolo[3,4-c]pyrrole-1,4-dione (**S5**)<sup>5,6</sup>

A mixture of compound **S3** (301 mg, 0.50 mmol), 4-fluorophenylboronic acid (105 mg, 0.75 mmol),  $K_2CO_3$  (1.72 g, 12.50 mmol),  $Pd(PPh_3)_4$  (22.5 mg, 0.01 mmol), water (6.3 mL), and THF (15 mL) was heated at 80 °C for 24 h under nitrogen. After cooling to room temperature, the reaction solution was poured into water (30 mL). The resulting solution was extracted with  $CH_2Cl_2$  (3 × 20 mL). The combined organic phases were dried over anhydrous  $Na_2SO_4$  and then evaporated under reduced pressure. The crude product was purified by column chromatography on silica gel with petroleum ether/ $CH_2Cl_2$  (1:1, v/v) to give a red-purple solid. (294 mg, 95%). M.p.:141-143 °C.  $^1H$ -NMR (500 MHz,  $CDCl_3$ , ppm)  $\delta$  8.92 (d,  $J$  = 4.0 Hz, 1H), 8.89 (d,  $J$  = 3.5 Hz, 1H), 7.67-7.60 (m, 3H), 7.39 (d,  $J$  = 4.1 Hz, 1H), 7.27 (d,  $J$  = 4.2 Hz, 1H), 7.12 (t,  $J$  = 8.5 Hz, 2H), 4.13-3.96 (m, 4H), 1.98-1.80 (m, 2H), 1.32 (m, 16H), 0.92-0.84(m, 12H).

### Synthesis of 3-(5-(3,5-difluorophenyl)thiophen-2-yl)-2,5-bis(2-ethylhexyl)-6-(thiophen-2-yl)-2,5-dihydropyrrolo[3,4-c]pyrrole-1,4-dione (**S6**)<sup>5,6</sup>

A mixture of compound **S3** (277 mg, 0.46 mmol), 3,5-difluoro-phenylboronic acid (108 mg, 0.69 mmol),  $Pd(PPh_3)_4$  (20 mg, 0.02 mmol),  $K_2CO_3$  (1.58 g, 11.45 mmol), THF (15 mL) and, water (5.8

mL) was heated at 80 °C for 24 h under nitrogen. After cooling to room temperature, the reaction solution was poured into water (30 mL). The resulting mixture was extracted with CH<sub>2</sub>Cl<sub>2</sub> (3 × 20 mL). The combined organic phase was dried over anhydrous Na<sub>2</sub>SO<sub>4</sub>. After removing the solvent, the crude product was purified by column chromatography on silica gel with petroleum ether/CH<sub>2</sub>Cl<sub>2</sub> (1:1, v/v) to afford a purple-black solid. (286 mg, 98%). M.p.:137-139 °C. <sup>1</sup>H NMR (500 MHz, CDCl<sub>3</sub>, ppm) δ 8.93 (dd, *J*<sub>1</sub> = 4.0 Hz, *J*<sub>2</sub> = 1.0 Hz, 1H), 8.88 (d, *J* = 4.1 Hz, 1H), 7.65 (d, *J* = 5.0 Hz, 1H), 7.46 (d, *J* = 4.1 Hz, 1H), 7.28 (t, *J* = 4.0 Hz, 1H), 7.18 (d, *J* = 6.1 Hz, 2H), 6.83-6.77 (m, 1H), 4.10-3.99 (m, 4H), 1.94-1.83 (m, 2H), 1.43-1.21 (m, 16H), 0.94-0.83 (m, 12H).

**Synthesis of 3-(5-bromothiophen-2-yl)-6-(5-(4-fluorophenyl)thiophen-2-yl)-2,5-bis(2-ethylhexyl)-2,5-dihydropyrrolo[3,4-c]pyrrole-1,4-dione (S7)<sup>6</sup>**

A mixture of compound **S5** (352 mg, 0.57 mmol) and CHCl<sub>3</sub> (25 mL) was stirred at 0 °C for 20 min. A solution of NBS (101 mg, 0.57 mmol) in CHCl<sub>3</sub> (10 mL) was added dropwise to the reaction solution at 0 °C and the resulting mixture was stirred at room temperature overnight in dark. The reaction solution was poured into water (30 mL) and the resulting mixture was extracted with CH<sub>2</sub>Cl<sub>2</sub> (3 × 20 mL). The combined organic phase was dried over anhydrous Na<sub>2</sub>SO<sub>4</sub>. After removing the solvent, the crude product was purified by silica gel column chromatography with petroleum ether/CH<sub>2</sub>Cl<sub>2</sub> (1:1, v/v) as eluent to give a purple-black solid. (376 mg, 95%). M.p.:147-149 °C. <sup>1</sup>H-NMR (500 MHz, CDCl<sub>3</sub>, ppm) δ 8.93 (d, *J* = 4.1 Hz, 1H), 8.62 (d, *J* = 4.2 Hz, 1H), 7.64 (m, 2H), 7.38 (d, *J* = 4.1 Hz, 1H), 7.21 (d, *J* = 4.2 Hz, 1H), 7.13 (t, *J* = 8.5 Hz, 2H), 4.09-3.91 (m, 4H), 1.95-1.81 (m, 2H), 1.43-1.21 (m, 16H), 0.93-0.84 (m, 12H).

**Synthesis of 3-(5-bromothiophen-2-yl)-6-(5-(3,5-difluorophenyl)thiophen-2-yl)-2,5-bis(2-ethylhexyl)-2,5-dihydropyrrolo[3,4-c]pyrrole-1,4-dione (S8)<sup>6</sup>**

A mixture of compound **S6** (403 mg, 0.63 mmol) and CHCl<sub>3</sub> (25 mL) was stirred at 0 °C for 20 min. A solution of NBS (124 mg, 0.70 mmol) in CHCl<sub>3</sub> (10 mL) was added dropwise to the reaction solution at 0 °C and the resulting mixture was stirred at room temperature overnight in dark. The reaction solution was poured into water (30 mL) and resulting solution was extracted with CH<sub>2</sub>Cl<sub>2</sub> (3 × 20 mL). The combined organic phase was dried over anhydrous Na<sub>2</sub>SO<sub>4</sub>. After removing the solvent, the residue was purified by silica gel column chromatography with petroleum ether/CH<sub>2</sub>Cl<sub>2</sub> (1:2, v/v) to give a red solid. (609 mg, 63%). M.p.:177-179 °C. <sup>1</sup>H-NMR (500 MHz, CDCl<sub>3</sub>, ppm) δ 8.89 (d, *J* = 3.8 Hz, 1H), 8.67 (d, *J* = 4.0 Hz, 1H), 7.46 (d, *J* = 4.0 Hz, 1H), 7.23 (d, *J* =

4.0 Hz, 1H), 7.18 (d,  $J = 6.6$  Hz, 2H), 6.81 (t,  $J = 8.7$  Hz, 1H), 4.09-3.90 (m, 4H), 1.87 (d,  $J = 5.6$  Hz, 2H), 1.44-1.20 (m, 16H), 0.94-0.83 (m, 12H).

The synthesis procedures of compound **S9**, **S10**, **A2** and **A3** are referred to the reported procedure.<sup>4</sup> The synthesis details are provided as follows.

**Synthesis of 3-(5-(4-fluorophenyl)thiophen-2-yl)-2,5-bis(2-ethylhexyl)-6-(5-((trimethylsilyl)ethynyl)thiophen-2-yl)-2,5-dihydropyrrolo[3,4-c]pyrrole-1,4-dione (S9)**

A mixture of compound **S7** (601 mg, 0.86 mmol), Pd(PPh<sub>3</sub>)<sub>2</sub>Cl<sub>2</sub> (25 mg, 0.04 mmol), CuI (12 mg, 0.07 mmol), THF (25 mL), TEA (22 mL), and trimethylsilylacetylene (0.3 mL, 2.58 mmol) was heated at 70 °C for 24 h under nitrogen. After cooling to room temperature, the reaction solution was poured into water (30 mL). The resulting mixture was extracted with CH<sub>2</sub>Cl<sub>2</sub> (3 × 30 mL). The combined organic phase was dried with anhydrous Na<sub>2</sub>SO<sub>4</sub>. After removing the solvent, the residue was purified by silica gel column chromatography with petroleum ether/CH<sub>2</sub>Cl<sub>2</sub> (1:1, v/v) as eluent to afford a purple-black solid. (528 mg, 86%). M.p.:139-141 °C. <sup>1</sup>H-NMR (500 MHz, CDCl<sub>3</sub>, ppm) δ 8.95 (d,  $J = 4.1$  Hz, 1H), 8.79 (d,  $J = 4.1$  Hz, 1H), 7.68-7.61 (m, 2H), 7.39 (d,  $J = 4.0$  Hz, 1H), 7.32 (d,  $J = 4.0$  Hz, 1H), 7.13 (t,  $J = 8.4$  Hz, 2H), 4.10-3.95 (m, 4H), 1.96-1.83 (m, 2H), 1.42-1.24 (m, 16H), 0.93-0.84 (m, 12H), 0.28 (s, 9H).

**Synthesis of 3-(5-(3,5-difluorophenyl)thiophen-2-yl)-2,5-bis(2-ethylhexyl)-6-(5-((trimethylsilyl)ethynyl)thiophen-2-yl)-2,5-dihydropyrrolo[3,4-c]pyrrole-1,4-dione (S10)**

A mixture of compound **S8** (303 mg, 0.42 mmol), Pd(PPh<sub>3</sub>)<sub>2</sub>Cl<sub>2</sub> (20 mg, 0.03 mmol), CuI (14 mg, 0.07 mmol), THF (20 mL), TEA (11 mL), and trimethylsilylacetylene (0.18 mL, 1.26 mmol) was heated at 70 °C for 24 h under nitrogen. After cooling to room temperature, the reaction solution was poured into water (30 mL). The resulting solution was extracted with CH<sub>2</sub>Cl<sub>2</sub> (3 × 20 mL). The combined organic layers were dried with anhydrous Na<sub>2</sub>SO<sub>4</sub>. After removing the solvent, the residue was purified by silica gel column chromatography with petroleum ether/CH<sub>2</sub>Cl<sub>2</sub> (1:2, v/v) as eluent to afford a purple-black solid. (276 mg, 89%). M.p.:164-166 °C. <sup>1</sup>H-NMR (500 MHz, CDCl<sub>3</sub>, ppm) δ 8.90 (d,  $J = 4.1$  Hz, 1H), 8.82 (d,  $J = 4.1$  Hz, 1H), 7.45 (d,  $J = 4.1$  Hz, 1H), 7.32 (d,  $J = 4.1$  Hz, 1H), 7.18 (d,  $J = 6.1$  Hz, 2H), 6.81 (t,  $J = 8.7$  Hz, 1H), 4.08-3.96 (m, 4H), 1.94-1.83 (m, 2H), 1.43-1.20 (m, 16H), 0.94-0.84 (m, 12H), 0.28 (s, 9H).

**Synthesis of 3-(5-ethynylthiophen-2-yl)-6-(5-(4-fluorophenyl)thiophen-2-yl)-2,5-bis(2-ethylhexyl)-2,5-dihydropyrrolo[3,4-c]pyrrole-1,4-dione (A2)**

A mixture of compound **S9** (614 mg, 0.86 mmol), K<sub>2</sub>CO<sub>3</sub> (1.58 g, 11.45 mmol), THF (25 mL), and methanol (25 mL) was stirred at room temperature for 2 h. The reaction solution was poured into water (30 mL) and the resulting solution was extracted with CH<sub>2</sub>Cl<sub>2</sub> (3 × 20 mL). The combined organic was dried with anhydrous Na<sub>2</sub>SO<sub>4</sub>. After removing the solvent, the residue was purified by silica gel column chromatography with petroleum ether/CH<sub>2</sub>Cl<sub>2</sub> (1:1, v/v) to afford a black solid. (408 mg, 74%). M.p.:133-135 °C. <sup>1</sup>H-NMR (500 MHz, CDCl<sub>3</sub>, ppm) δ 8.96 (d, *J* = 4.1 Hz, 1H), 8.79 (d, *J* = 4.1 Hz, 1H), 7.65 (dd, *J*<sub>1</sub> = 8.2 Hz, *J*<sub>2</sub> = 5.3 Hz, 2H), 7.41-7.36 (m, 2H), 7.13 (t, *J* = 8.6 Hz, 2H), 4.10-3.94 (m, 4H), 3.58 (s, 1H), 1.96-1.84 (m, 2H), 1.37-1.25 (m, 16H), 0.92-0.85 (m, 12H).

**Synthesis of 3-(5-(3,5-difluorophenyl)thiophen-2-yl)-6-(5-ethynylthiophen-2-yl)-2,5-bis(2-ethylhexyl)-2,5-dihydropyrrolo[3,4-c]pyrrole-1,4-dione (A3)**

A mixture of compound **S10** (276 mg, 0.38 mmol), K<sub>2</sub>CO<sub>3</sub> (212 mg, 1.52 mmol), THF (15 mL), and methanol (15 mL) was stirred at room temperature for 2 h. The reaction solution was poured into water (30 mL) and the resulting solution was extracted with CH<sub>2</sub>Cl<sub>2</sub> (3 × 20 mL). The combined organic phase was dried with anhydrous Na<sub>2</sub>SO<sub>4</sub>. After removing the solvent, the residue was purified by silica gel column chromatography with petroleum ether/CH<sub>2</sub>Cl<sub>2</sub> (1:2, v/v) to give a black solid. (156 mg, 62%). M.p.:154-156 °C. <sup>1</sup>H-NMR (500 MHz, CDCl<sub>3</sub>, ppm) δ 8.93 (d, *J* = 4.1 Hz, 1H), 8.83 (d, *J* = 4.1 Hz, 1H), 7.46 (d, *J* = 4.1 Hz, 1H), 7.38 (d, *J* = 4.1 Hz, 1H), 7.18 (d, *J* = 6.1 Hz, 2H), 6.85-6.78 (m, 1H), 4.10-3.95 (m, 4H), 3.59 (s, 1H), 1.94-1.83 (m, 2H), 1.33-1.18 (m, 16H), 0.93-0.81 (m, 12H).

## 2. Spectra of $^1\text{H-NMR}$ , $^{13}\text{C-NMR}$ , and MALDI-TOF HRMS

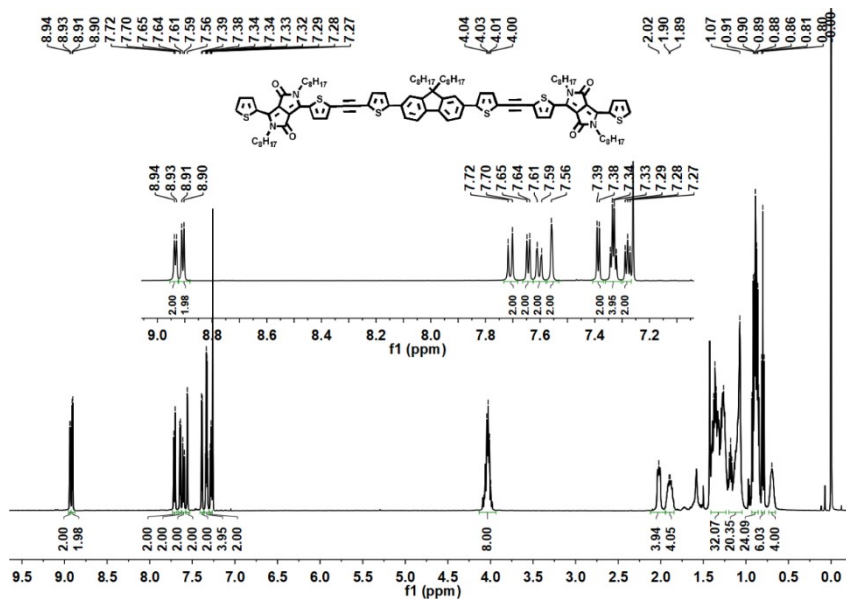

Figure S1.  $^1\text{H-NMR}$  spectrum of Flu(DPP) $_2$ .

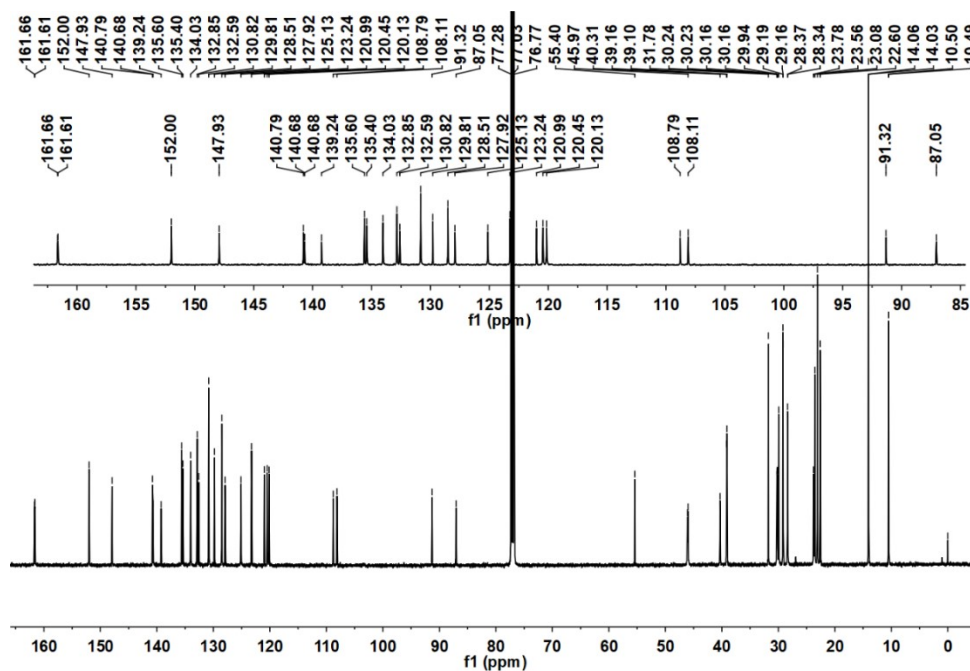

Figure S2.  $^{13}\text{C-NMR}$  spectrum of Flu(DPP) $_2$ .



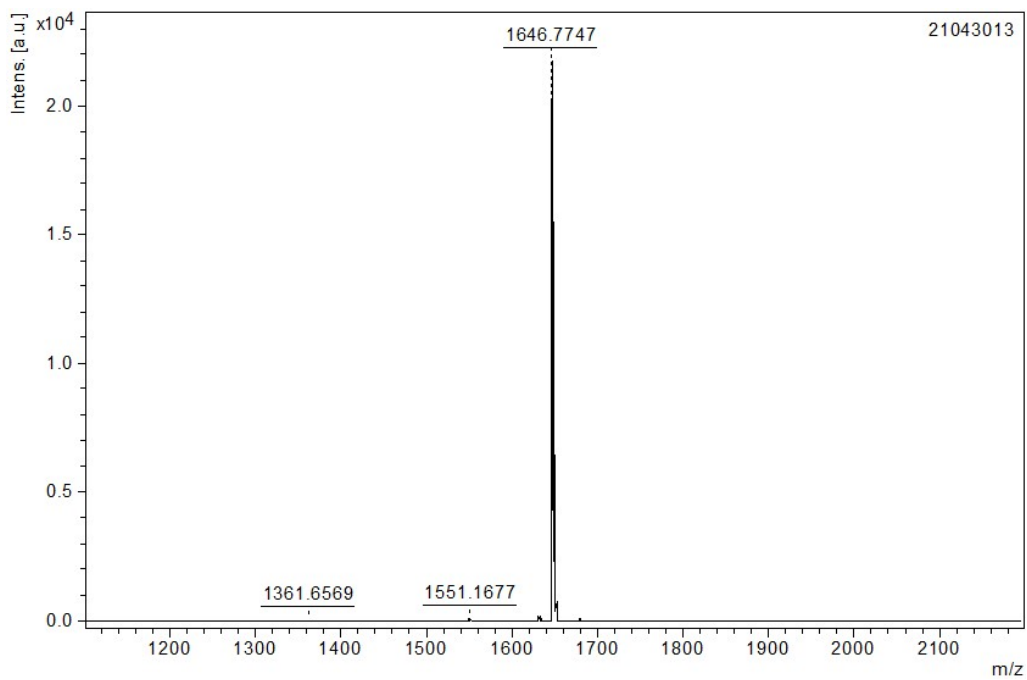

**Figure S3.** MALDI-TOF HRMS spectrum of **Flu(DPP)<sub>2</sub>**. (calcd for  $C_{101}H_{122}N_4O_4S_6$  : 1646.7990)

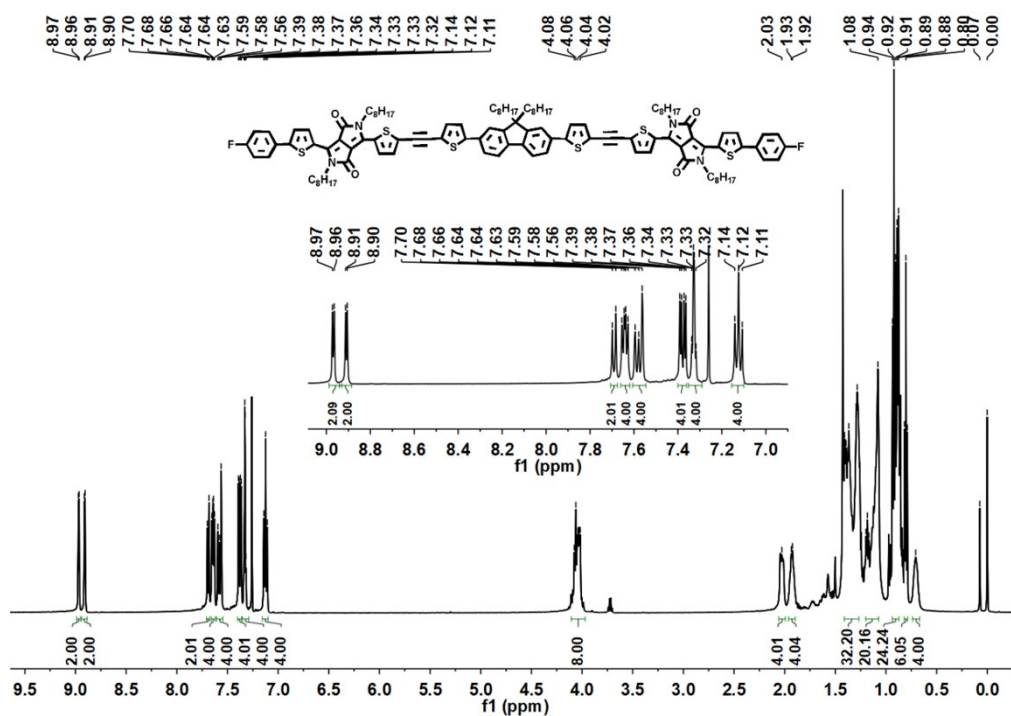

**Figure S4.**  $^1H$ -NMR spectrum of **Flu(DPPsF)<sub>2</sub>**.

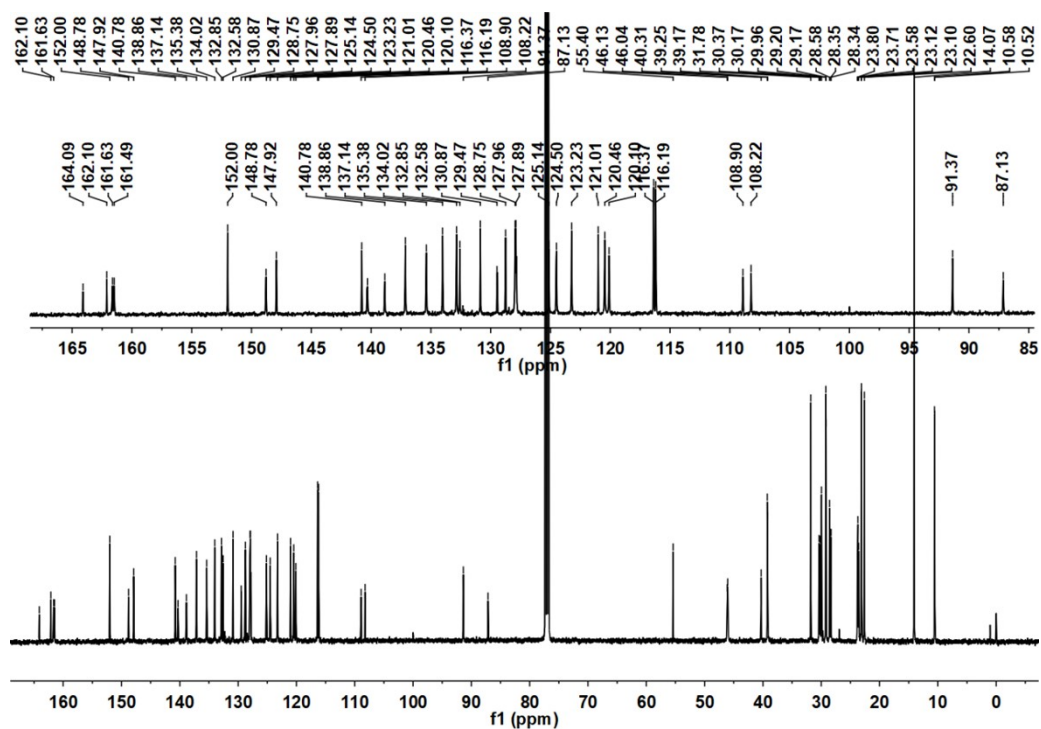

Figure S5.  $^{13}\text{C}$ -NMR spectrum of  $\text{Flu}(\text{DPPsF})_2$ .

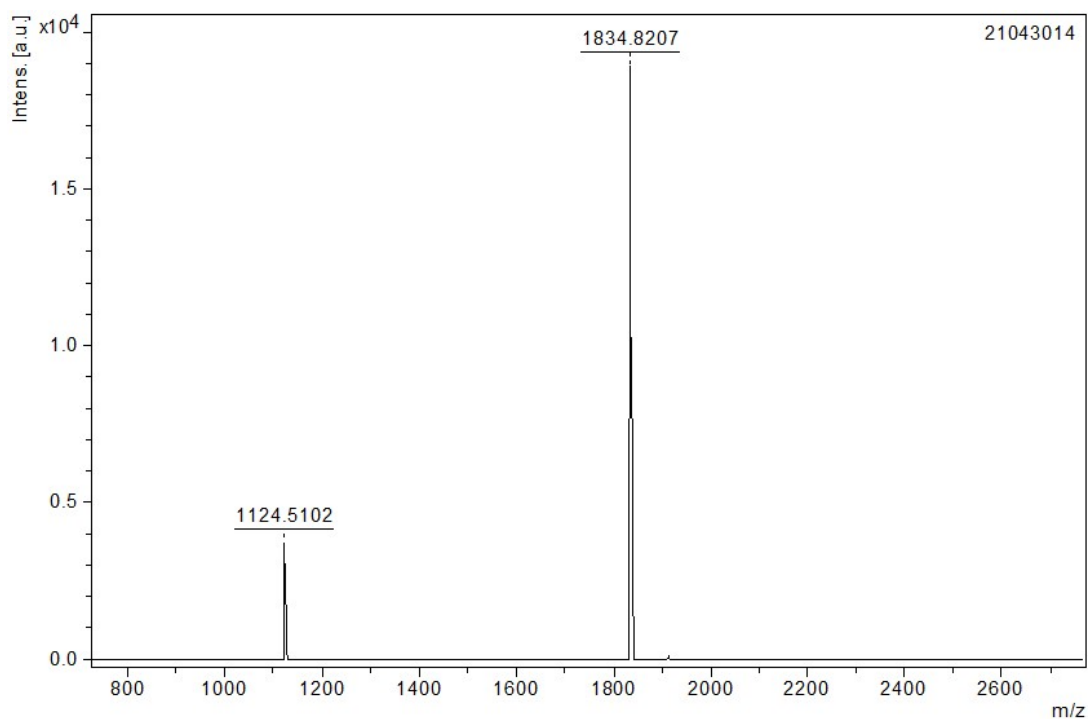

Figure S6. MALDI-TOF HRMS spectrum of  $\text{Flu}(\text{DPPsF})_2$ . (calcd for  $\text{C}_{113}\text{H}_{128}\text{F}_2\text{N}_4\text{O}_4\text{S}_6$  : 1834.8228)

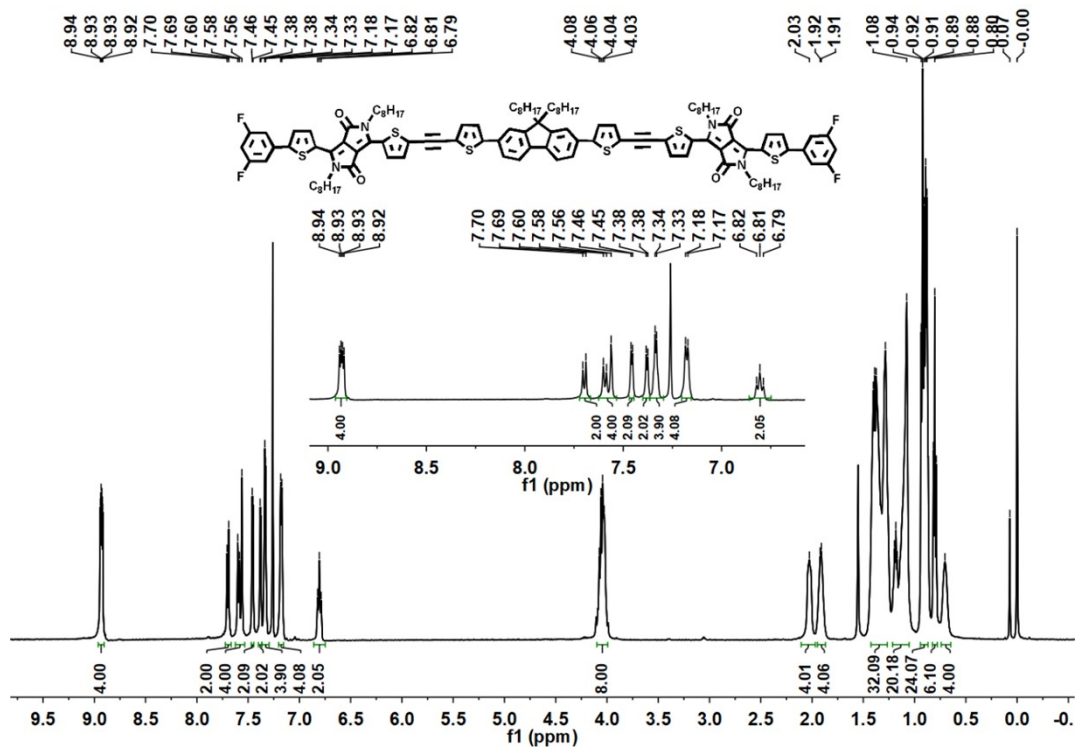

Figure S7. <sup>1</sup>H-NMR spectrum of Flu(DPPdF)<sub>2</sub>.

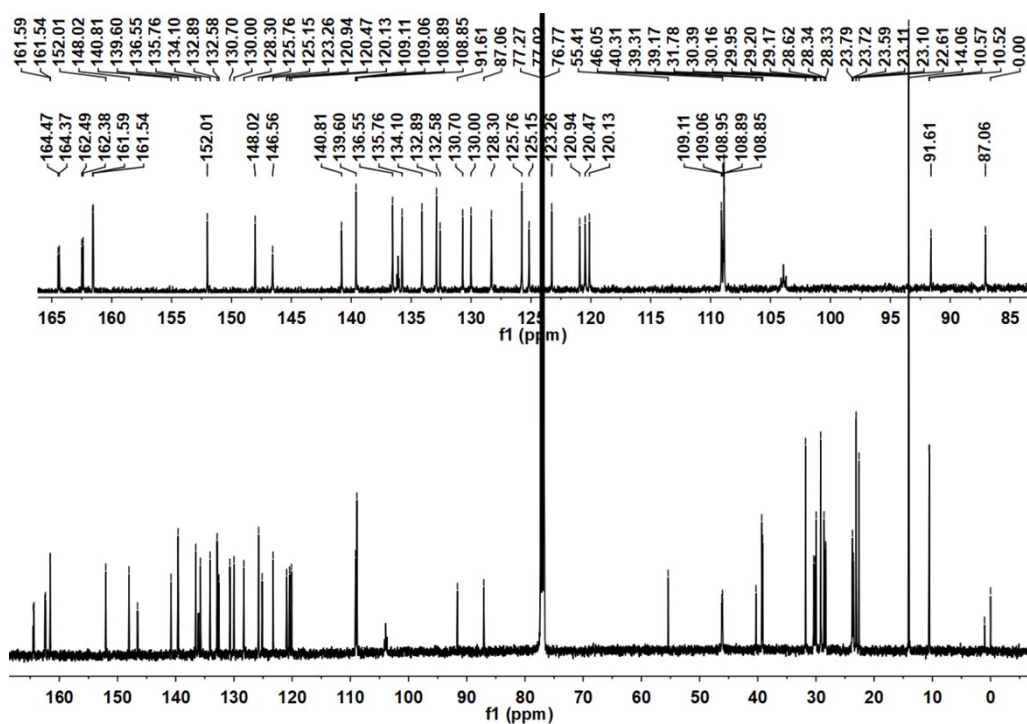

Figure S8. <sup>13</sup>C-NMR spectrum of Flu(DPPdF)<sub>2</sub>.

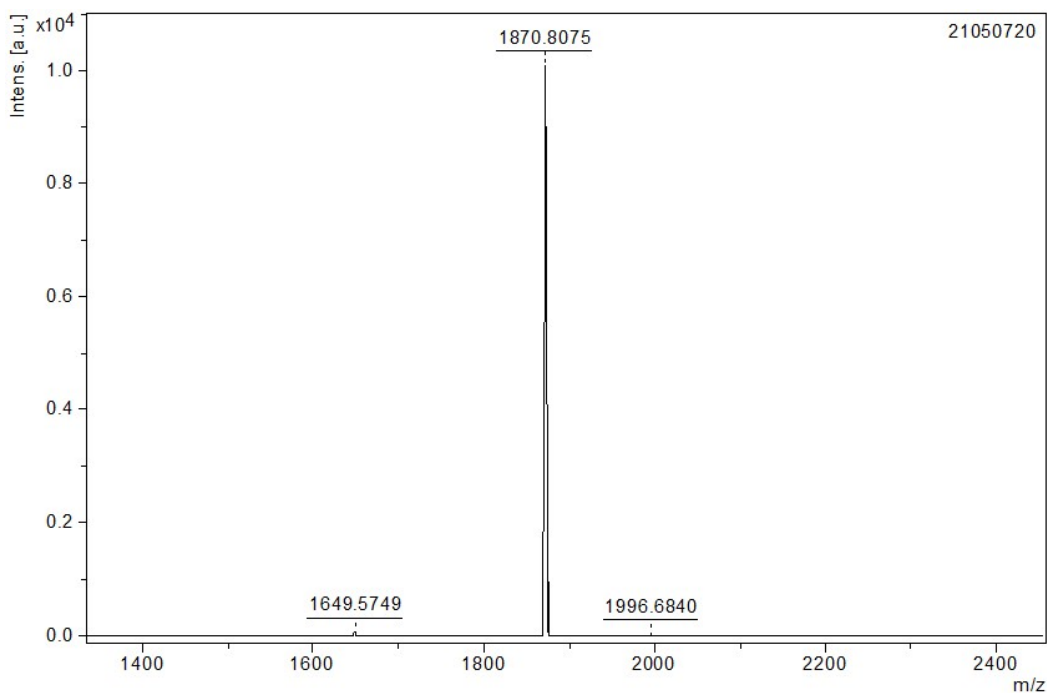

**Figure S9.** MALDI-TOF HRMS spectrum of **Flu(DPPdF)<sub>2</sub>**. (calcd for C<sub>113</sub>H<sub>126</sub>F<sub>4</sub>N<sub>4</sub>O<sub>4</sub>S<sub>6</sub> : 1870.8039)

### 3. TD-DFT calculated electronic transitions

**Table S1.** TD-DFT calculated electronic transitions of three compounds **Flu(DPP)<sub>2</sub>**, **Flu(DPPsF)<sub>2</sub>**, and **Flu(DPPdF)<sub>2</sub>**.

| Compound                      | State | $E^{\text{opt}}$ (eV) | $\lambda$ (nm) | f      | Composition       |
|-------------------------------|-------|-----------------------|----------------|--------|-------------------|
| <b>Flu(DPP)<sub>2</sub></b>   | S1    | 1.87                  | 662            | 3.6031 | HOMO→LUMO (66%)   |
|                               | S7    | 2.68                  | 462            | 0.3396 | HOMO→LUMO+2 (67%) |
| <b>Flu(DPPsF)<sub>2</sub></b> | S1    | 1.80                  | 689            | 4.0517 | HOMO→LUMO (65%)   |
|                               | S18   | 3.27                  | 379            | 0.3991 | HOMO→LUMO+4 (57%) |
| <b>Flu(DPPdF)<sub>2</sub></b> | S1    | 1.79                  | 692            | 3.9987 | HOMO→LUMO (65%)   |
|                               | S18   | 3.29                  | 377            | 0.6001 | HOMO-6→LUMO (46%) |

#### 4. CV curve of Fc/Fc<sup>+</sup>

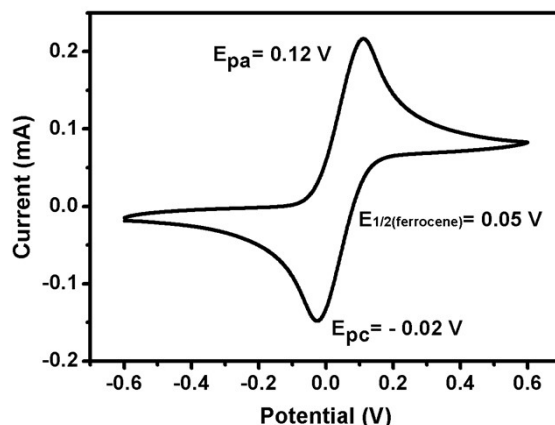

**Fig. S10.** The CV curve of Fc/Fc<sup>+</sup> in 0.1 M Bu<sub>4</sub>NBF<sub>4</sub>/CH<sub>2</sub>Cl<sub>2</sub> solution at a scan rate of 100 mV s<sup>-1</sup> under nitrogen.

#### 5. Contact angle measurements

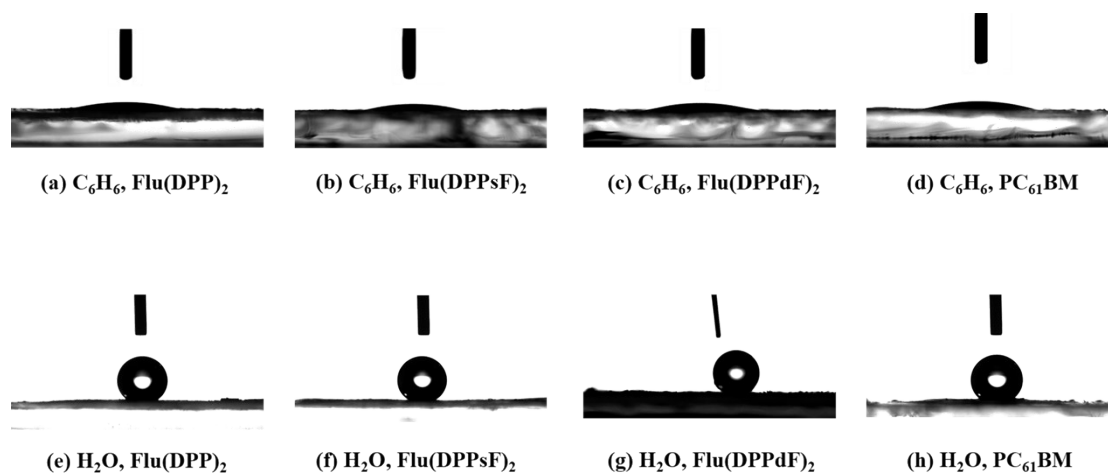

**Fig. S11.** Contact angle measurements of Flu(DPP)<sub>2</sub>, Flu(DPPsF)<sub>2</sub>, Flu(DPPdF)<sub>2</sub> and PC<sub>61</sub>BM

To investigate the miscibility and the interface properties of three SMDs and PC<sub>61</sub>BM, contact angle measurements of the three SMDs and PC<sub>61</sub>BM were conducted. As we all know, ideal active layer morphology means good miscibility and similar contact angles of donors and acceptors.<sup>7</sup> As shown in **Fig. S11**, the contact angles are 13.5° and 140.3° for Flu(DPP)<sub>2</sub> film in n-hexane and deionized water, 13.6° and 145.8° film for Flu(DPPsF)<sub>2</sub>, 13.7° and 139.1° for Flu(DPPdF)<sub>2</sub>, 16.0° and 136.8° for PC<sub>61</sub>BM film, respectively. Compare with Flu(DPP)<sub>2</sub> and Flu(DPPsF)<sub>2</sub>, the contact angle of Flu(DPPdF)<sub>2</sub> is most similar to those of PC<sub>61</sub>BM, indicating that there is most appropriate miscibility between Flu(DPPdF)<sub>2</sub> and PC<sub>61</sub>BM, which would be helpful for the formation of excellent bulk hetero-junction (BHJ)

morphology<sup>7, 8</sup>.

## 6. References

- 1 A. B. Tamayo, B. Walker and T. Q. Nguyen, *J. Phys. Chem. C*, 2008, **112**, 11545–11551.
- 2 X. A. Jeanbourquin, A. Rahmanudin, X. Yu, M. Johnson, N. Guijarro, L. Yao and K. Sivula, *ACS Appl. Mater. Interfaces*, 2017, **9**, 27825–27831.
- 3 P. Sonar, G. M. Ng, T. T. Lin, A. Dodabalapur and Z. K. Chen, *J. Mater. Chem.*, 2010, **20**, 3626–3636.
- 4 F. Cheng, X. He, L. Yin, B. Xie and Y. Li, *Dye. Pigment.*, 2020, **176**, 108211.
- 5 H. Gao, Y. Li, L. Wang, C. Ji, Y. Wang, W. Tian, X. Yang and L. Yin, *Chem. Commun.*, 2014, **50**, 10251–10254.
- 6 J. Y. Pan, L. J. Zuo, X. L. Hu, W. F. Fu, M. R. Chen, L. Fu, X. Gu, H. Q. Shi, M. M. Shi, H. Y. Li and H. Z. Chen, *ACS Appl. Mater. Interfaces*, 2013, **5**, 972–980.
- 7 Y. Wang, S. Dong, Y. Miao, D. Li, W. Qin, H. Cao, L. Yang, L. Li and S. Yin, *IEEE J. Photovoltaics*, 2017, **7**, 550–557.
- 8 M. Li, S. Wang, C. Bao, Z. Liu, D. Bai, Z. Yang, W. Zhu, Q. Peng and Y. Liu, *J. Mater. Chem. C*, 2019, **7**, 12217–12230.
